# Supplementary material for: Hydrazine dihydrochloride as a new additive to promote the performance of tin-based mixed organic cation perovskite solar cells
Source: Royal Society of Chemistry journal article supplement (doi:10.1039/d1se00160d), 2021-01-01
Supplement: d1se00160d1.pdf [file d1se00160d1.pdf]

## Supporting Information

# Hydrazine dihydrochloride as a new additive to promote performance of tin-based mixed organic cation perovskite solar cells

*Jiayu You<sup>a,b</sup>, Meng Wang<sup>a,b</sup>, Cunyun Xu<sup>a,b</sup>, Yanqing Yao<sup>a,b</sup>, Shengxu Zhao<sup>c</sup>, Debei Liu<sup>d</sup>,  
Jun Dong<sup>a,b</sup>, Pengju Guo<sup>a,b</sup>, Gaobo Xu<sup>a,b</sup>, Chuanyao Luo<sup>a,b</sup>, Yuanxin Zhong<sup>a,b</sup>,  
Qunliang Song<sup>a,b,\*</sup>*

*<sup>a</sup>Institute for Clean Energy and Advanced Materials, School of Materials and Energy,  
Southwest University, Chongqing 400715, P. R. China*

*<sup>b</sup>Chongqing key Laboratory for Advanced Materials and Technologies of Clean  
Energy, Chongqing 400715, P. R. China*

*<sup>c</sup>Key Laboratory Photoelectric Technology, Chongqing University, Chongqing  
400044. P. R. China*

*<sup>d</sup>Chongqing Shenhua Thin Film Solar Technology Co., Ltd., Chongqing 400722, P. R.  
China*

*\*Corresponding author. E-mail address: qlsong@swu.edu.cn (Q. Song).*

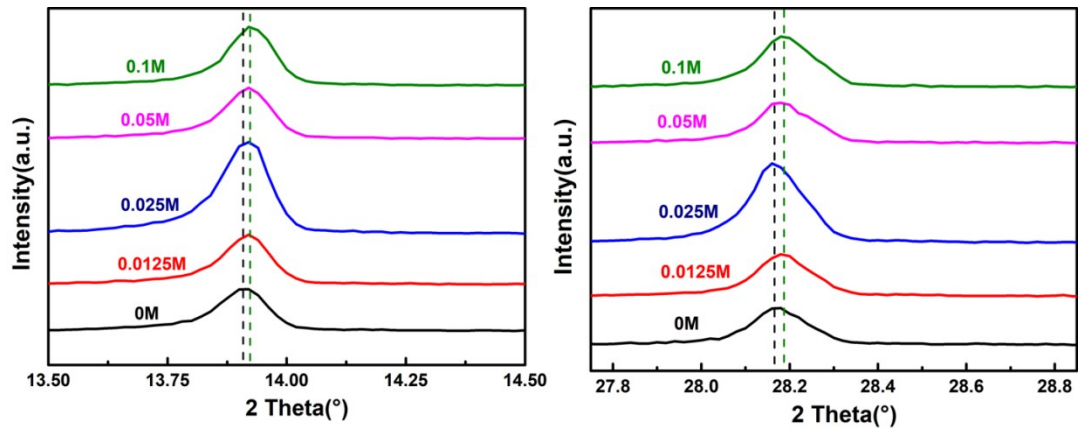

Figure S1. The enlarged XRD pattern of various concentrations of HD in the 13.5~14.5° and 27.75~28.85° regions.

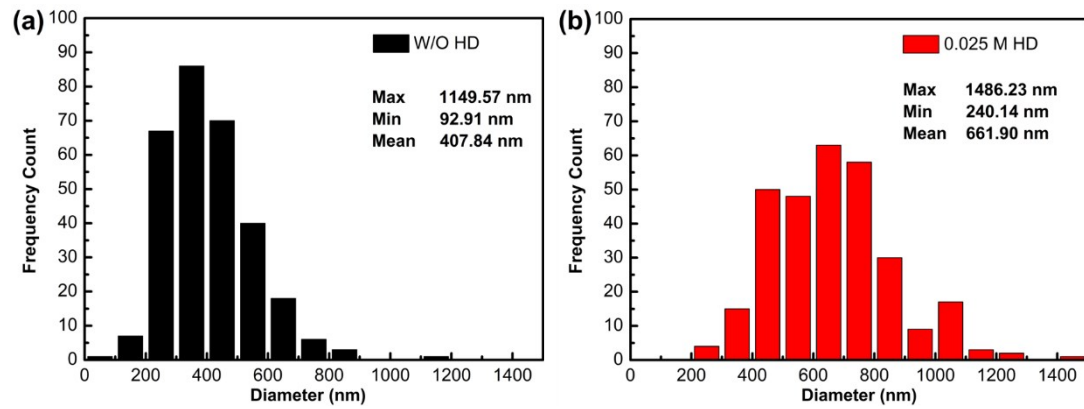

Figure S2. The grain size distributions of the (a)  $\text{FA}_{0.75}\text{MA}_{0.25}\text{SnI}_3$  and (b) 0.025 M HD  $\text{FA}_{0.75}\text{MA}_{0.25}\text{SnI}_3$  film.

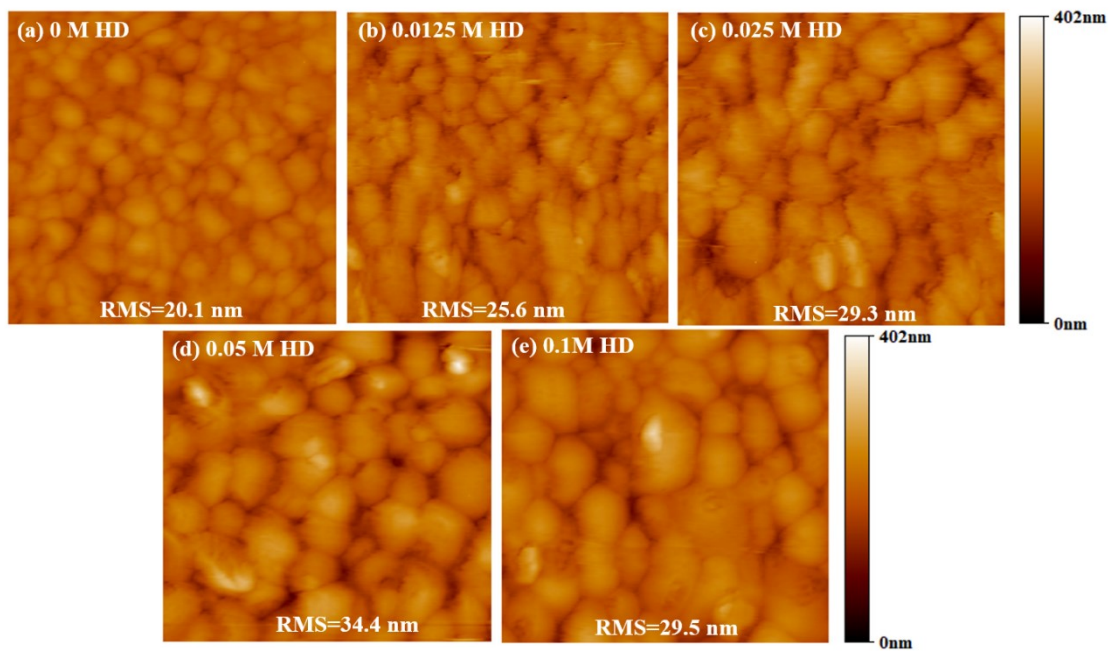

Figure S3. Atomic force microscope images of (a) the control  $\text{FA}_{0.75}\text{MA}_{0.25}\text{SnI}_3$  without HD and the  $\text{FA}_{0.75}\text{MA}_{0.25}\text{SnI}_3$  perovskite films with (b) 0.0125M HD, (c) 0.025M HD, (d) 0.05M HD, (e) 0.1M HD.

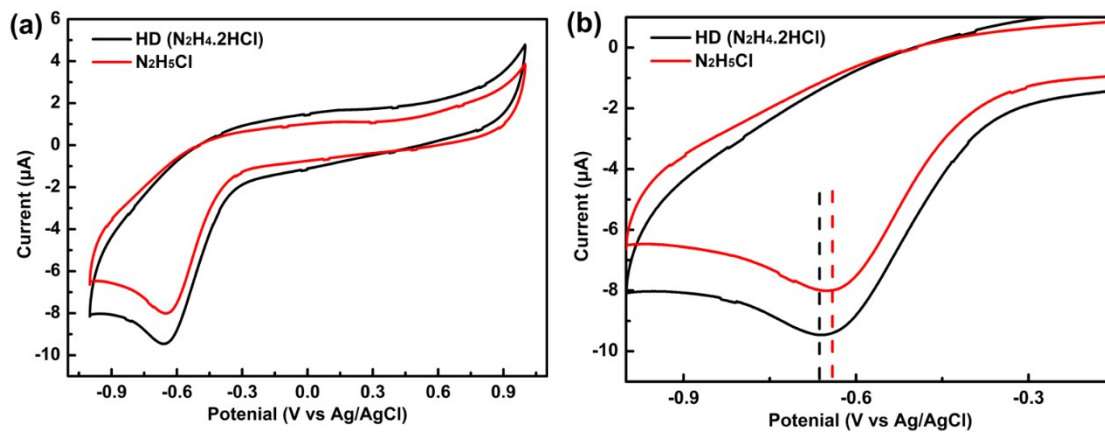

Figure S4. The CV curves of HD and  $\text{N}_2\text{H}_5\text{Cl}$ .

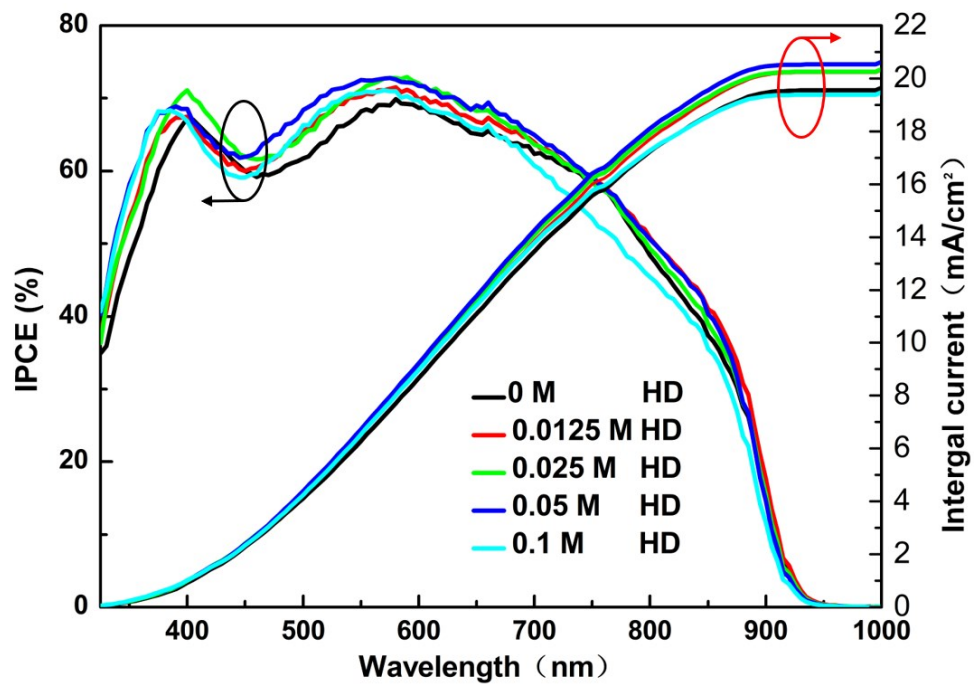

Figure S5. IPCE of the control FA<sub>0.75</sub>MA<sub>0.25</sub>SnI<sub>3</sub> without HD and the FA<sub>0.75</sub>MA<sub>0.25</sub>SnI<sub>3</sub> perovskite films with 0.0125, 0.025, 0.05 and 0.1 M HD, respectively.

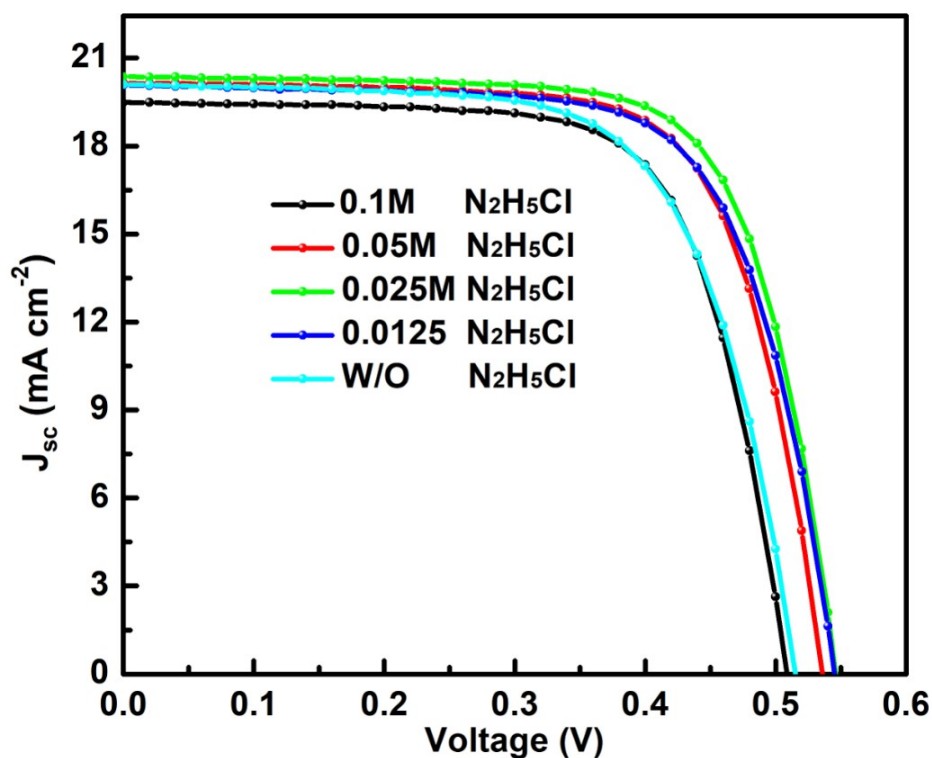

Figure S6. The J-V curves of the devices with different contents of N<sub>2</sub>H<sub>5</sub>Cl.

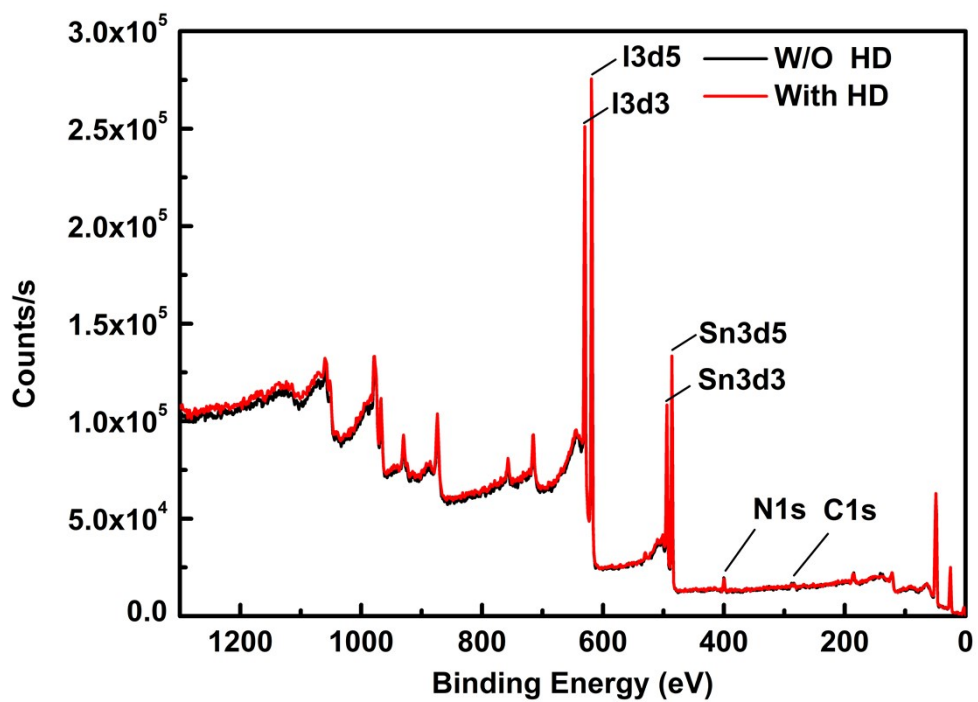

Figure S7. The X-ray photo-electron spectra of  $\text{FA}_{0.75}\text{MA}_{0.25}\text{SnI}_3$  and  $\text{FA}_{0.75}\text{MA}_{0.25}\text{SnI}_3$  with 0.025 M HD.

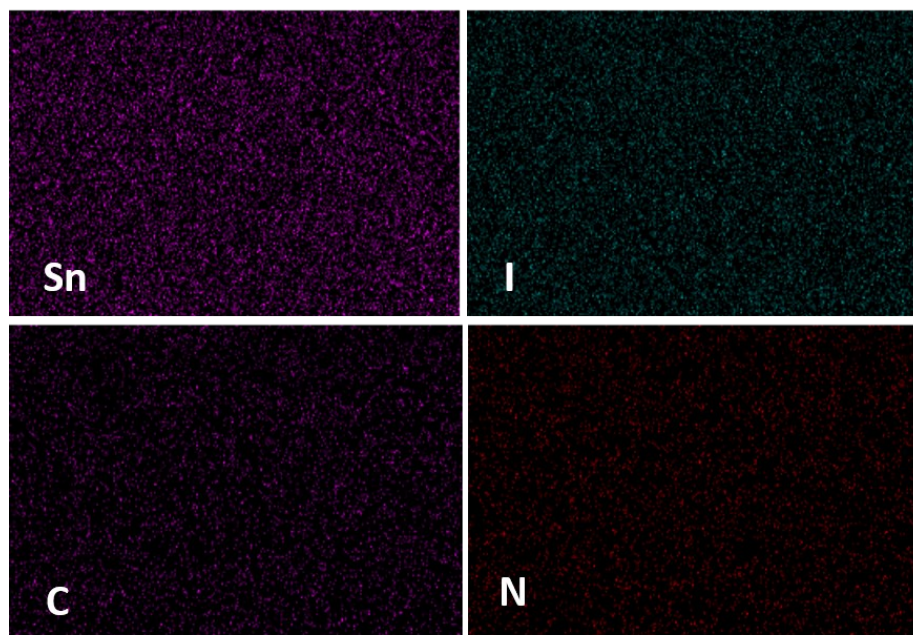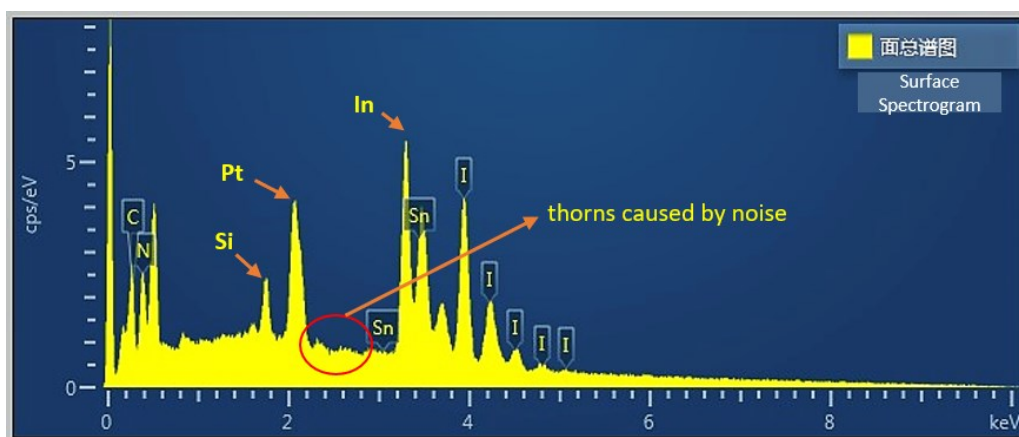

Notes: The whole spectrum of elemental analysis. (1) Si and In are the result of a small amount of ITO and glass powder sputtering on the perovskite surface during sample preparation, Pt is the result of spraying on the film surface during element analysis rather than the characteristic peak of chlorine.

Figure S8. The energy-dispersive X-ray spectroscopy (EDS) mapping and the whole spectrum of elemental analysis for the perovskite film with 0.025 M HD.

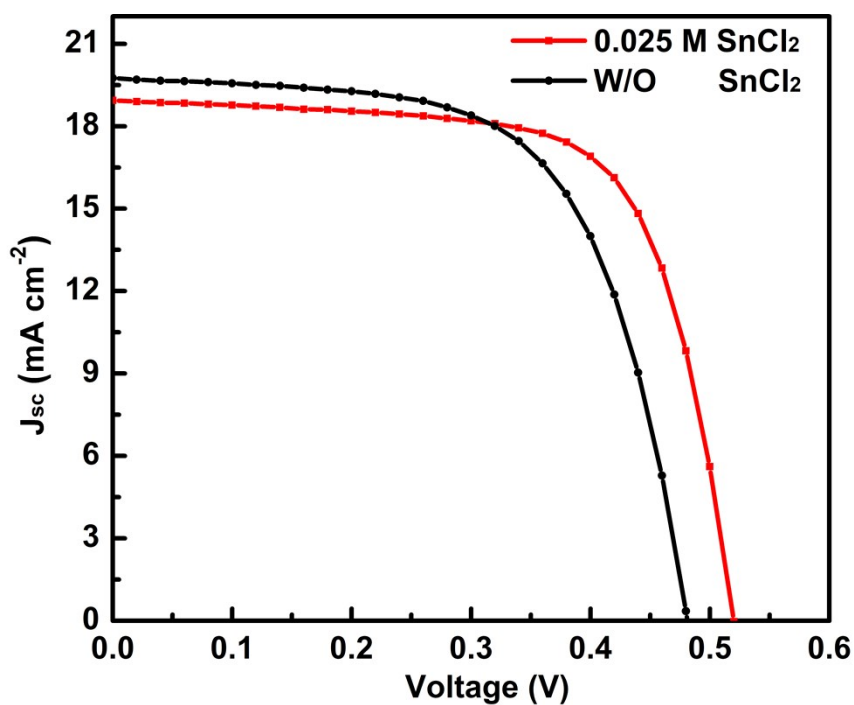

Figure S9. The J-V curve of the device fabricated from  $\text{FA}_{0.75}\text{MA}_{0.25}\text{SnI}_3$  perovskite precursor with 0.025 M  $\text{SnCl}_2$  additive.

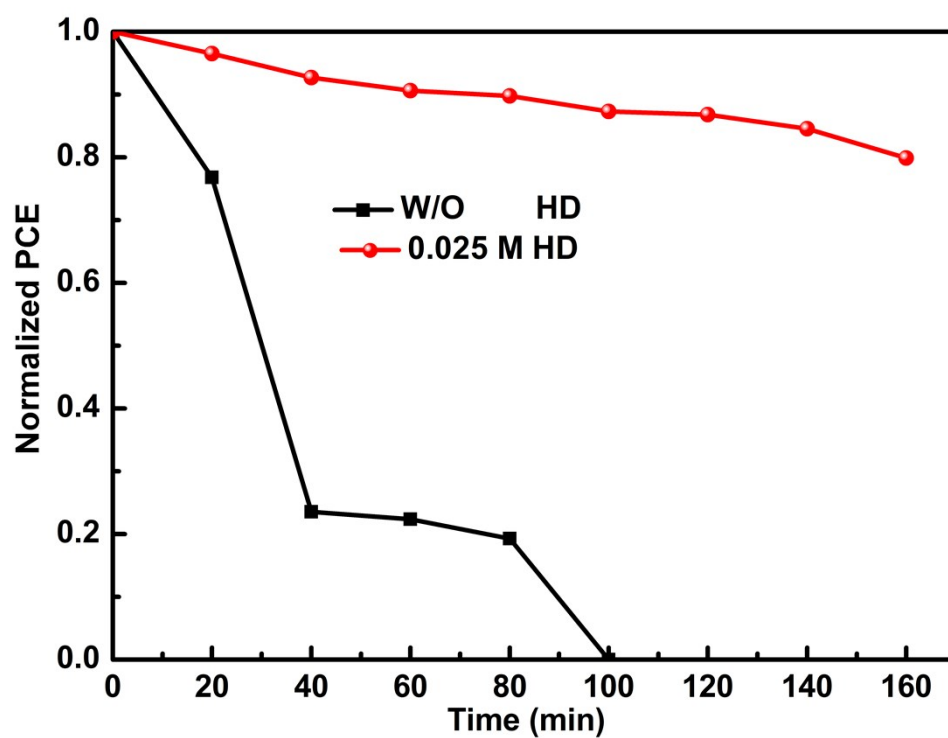

Figure S10. The thermal stability of devices without and with 0.025 M HD additive which were placed on an 85°C hotplate.

Equation S1. The reaction equations of tin (II) in different acid-base environments <sup>1</sup>

Spontaneous reduction of tin in alkaline medium :

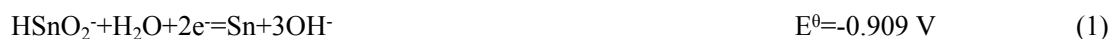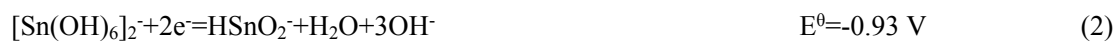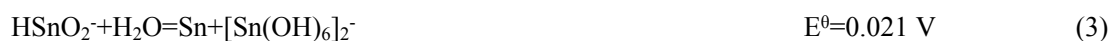

Spontaneous reduction of tin in acidic medium :

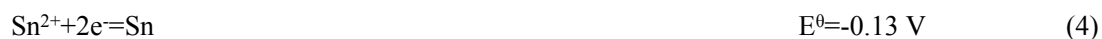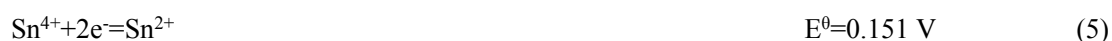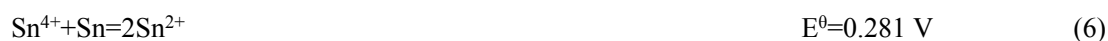

Table S1a. The pH of FA<sub>0.75</sub>MA<sub>0.25</sub>SnI<sub>3</sub> perovskite precursors with various amounts of HD.

| Concentration (mol/L) | 0   | 0.0125 | 0.025 | 0.05 | 0.1 |
|-----------------------|-----|--------|-------|------|-----|
| pH                    | 5.8 | 5.5    | 5.1   | 4.9  | 4.4 |

Table S1b. The pH of FA<sub>0.75</sub>MA<sub>0.25</sub>SnI<sub>3</sub> perovskite precursors with various amount of N<sub>2</sub>H<sub>5</sub>Cl.

| Concentration (mol/L) | 0   | 0.0125 | 0.025 | 0.05 | 0.1 |
|-----------------------|-----|--------|-------|------|-----|
| pH                    | 5.8 | 5.7    | 5.5   | 5.4  | 4.8 |

Table S2. The fitting results of XPS spectra for the control FA<sub>0.75</sub>MA<sub>0.25</sub>SnI<sub>3</sub> and the optimal FA<sub>0.75</sub>MA<sub>0.25</sub>SnI<sub>3</sub> films.

| W/O HD       | Sn 3d <sub>5/2</sub> |                  | Sn 3d <sub>3/2</sub> |                  |
|--------------|----------------------|------------------|----------------------|------------------|
|              | Sn <sup>2+</sup>     | Sn <sup>4+</sup> | Sn <sup>2+</sup>     | Sn <sup>4+</sup> |
| Position(eV) | 485.196              | 485.97           | 493.796              | 494.57           |
| FWHM         | 1.112                | 1.31             | 1.112                | 1.31             |
| Area         | 39464.66             | 18851.27         | 31685.63             | 14138.45         |
| 0.025M HD    | Sn 3d <sub>5/2</sub> |                  | Sn 3d <sub>3/2</sub> |                  |
|              | Sn <sup>2+</sup>     | Sn <sup>4+</sup> | Sn <sup>2+</sup>     | Sn <sup>4+</sup> |
| Position(eV) | 485.683              | 486.58           | 494.093              | 495.18           |
| FWHM         | 1.047                | 1.672            | 1.047                | 1.672            |
| Area         | 39464.66             | 18851.27         | 31685.63             | 14138.45         |



Table S3. Photovoltaic parameters of devices with different concentrations of  $\text{N}_2\text{H}_5\text{Cl}$  as additives.

| Concentration (mol/L) | $V_{oc}$ (V) | $J_{sc}$ ( $\text{mA}\cdot\text{cm}^{-2}$ ) | FF (%) | PCE (%) |
|-----------------------|--------------|---------------------------------------------|--------|---------|
| 0                     | 0.556        | 18.92                                       | 64.64  | 6.80    |
| 0.0125                | 0.542        | 19.42                                       | 67.48  | 7.11    |
| 0.025                 | 0.569        | 20.42                                       | 70.93  | 8.24    |
| 0.05                  | 0.536        | 19.59                                       | 71.04  | 7.45    |
| 0.1                   | 0.509        | 19.09                                       | 69.75  | 6.77    |

Table S4. Perovskite film thickness corresponding to different concentrations of HD as additive.

| Concentration (mol/L) | 0      | 0.0125 | 0.025  | 0.05   | 0.1    |
|-----------------------|--------|--------|--------|--------|--------|
| Thickness (nm)        | 197.11 | 197.63 | 196.16 | 194.43 | 195.25 |

Table S5. The photovoltage parameter comparison of devices with and without 0.025M  $\text{SnCl}_2$  additive.

| Additive                | $V_{oc}$ (V) | $J_{sc}$ ( $\text{mA}\cdot\text{cm}^{-2}$ ) | FF (%) | PCE (%) |
|-------------------------|--------------|---------------------------------------------|--------|---------|
| W/O $\text{SnCl}_2$     | 0.520        | 18.98                                       | 68.62  | 6.77    |
| 0.025 M $\text{SnCl}_2$ | 0.481        | 19.72                                       | 63.17  | 5.99    |

## Reference

1. X. Meng, T. Wu, X. Liu, X. He, T. Noda, Y. Wang, H. Segawa and L. Han, *The Journal of Physical Chemistry Letters*, 2020, **11**, 2965-2971.
